# Supplementary material for: Preventing the Collapse Behavior of Polyurethane Foams with the Addition of Cellulose Nanofiber
Source: MDPI journal article supplement (doi:10.3390/polym15061499), 2023-03-17
Supplement: s1 [file s1]

Article

# Preventing the Collapse Behavior of Polyurethane Foams with the Addition of Cellulose Nanofiber

Sanghyeon Ju <sup>1,2</sup>, Ajeong Lee <sup>1</sup>, Youngeun Shin <sup>1</sup>, Hyekyeong Jang <sup>1</sup>, Jin-Woo Yi <sup>1</sup>, Youngseok Oh <sup>1</sup>, Nam-Ju Jo <sup>2,\*</sup> and Teahoon Park <sup>1,\*</sup>

<sup>1</sup> Composites Research Division, Korea Institute of Materials Science (KIMS), 797, Changwon-Daero, Seongsan-Gu, Changwon-si 51508, Republic of Korea

<sup>2</sup> School of Chemical Engineering, Pusan National University, Busan 46241, Republic of Korea

\* Correspondence: namjujo@pusan.ac.kr (N.-J.J.); thpark@kims.re.kr (T.P.); Tel.: +82-055-280-3158 (T.P.)

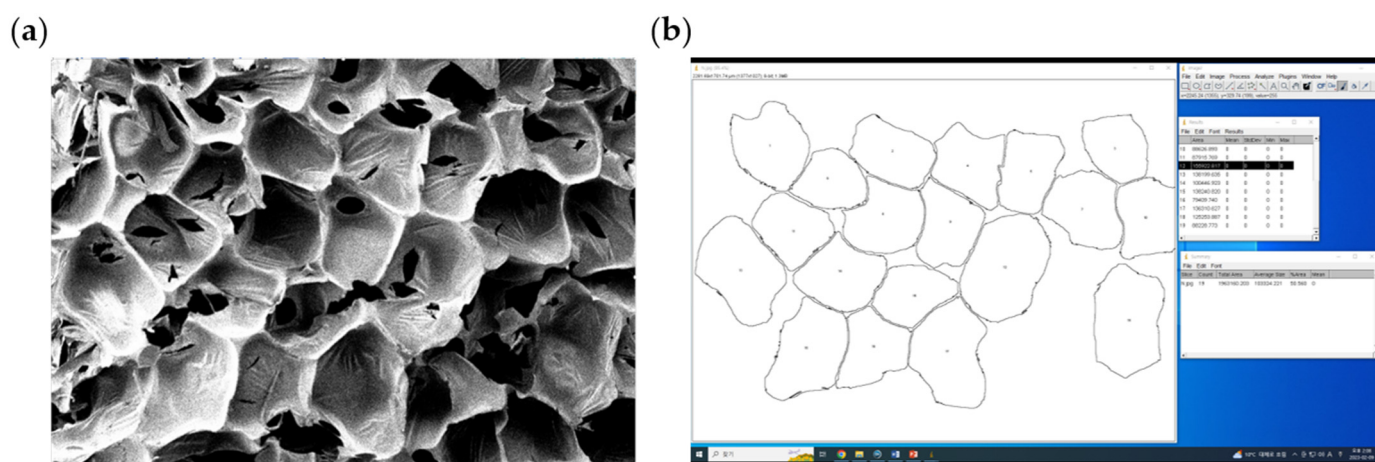

**Figure S1.** (a) The SEM of N, (b) Capture of measuring average cell area of N using Image J.

Figure S1 is an example of measuring the average cell area of samples using Image J freeware. Measurements were conducted without counting cells that could not be considered cells.

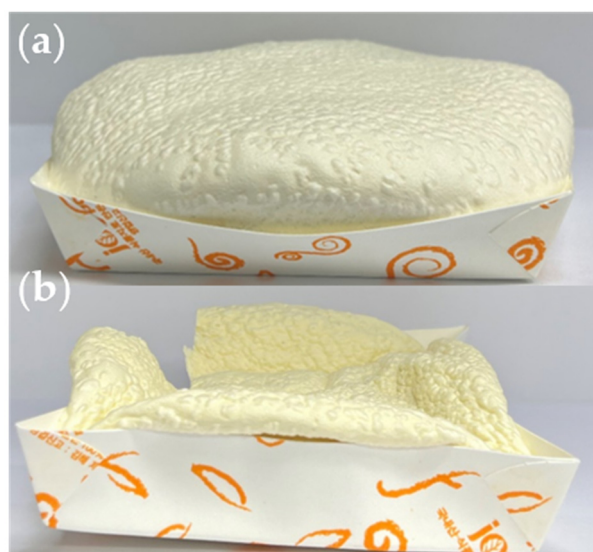

**Figure S2.** The picture of C3 at (a) day 1 and (b) day 14.

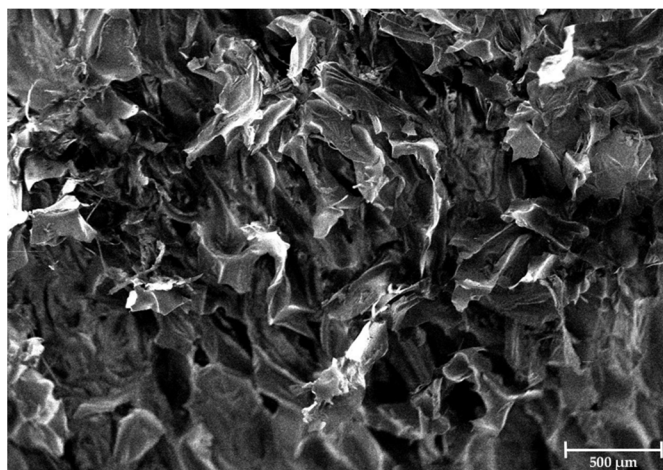

**Figure S3.** The SEM image of collapsed sample N.
